# Supplementary material for: Long-term cellular immunity of vaccines for Zaire Ebola Virus Diseases
Source: PubMed Central journal article supplement — Nat Commun. 2024 Sep 3;15:7666. doi: 10.1038/s41467-024-51453-z (PMC11372064; doi:10.1038/s41467-024-51453-z), 2024-09-03

**Supplementary Table 1. Description of the population included in the T-cell response analysis at months (M) 24, M36, M48, and M60.**

| <b>Characteristic</b>    | <b>Ad26-MVA group</b><br>N = 11 <sup>1</sup> | <b>rVSV group</b><br>N = 12 <sup>1</sup> | <b>rVSV-booster group</b><br>N = 8 <sup>1</sup> |
|--------------------------|----------------------------------------------|------------------------------------------|-------------------------------------------------|
| <b>Age at enrollment</b> | 25 [20; 31]                                  | 21 [20; 27]                              | 26 [19; 29]                                     |
| <b>Age by class</b>      |                                              |                                          |                                                 |
| 18-29                    | 7 (64%)                                      | 9 (75%)                                  | 6 (75%)                                         |
| 30-39                    | 3 (27%)                                      | 3 (25%)                                  | 1 (12%)                                         |
| ≥ 40                     | 1 (9%)                                       | 0 (0%)                                   | 1 (12%)                                         |
| <b>Sex</b>               |                                              |                                          |                                                 |
| Female                   | 5 (45%)                                      | 8 (67%)                                  | 4 (50%)                                         |
| Male                     | 6 (55%)                                      | 4 (33%)                                  | 4 (50%)                                         |

<sup>1</sup> Median [IQR]; n(%)

Supplementary Figure 1. Flow chart of the PREVAC immunological ancillary study

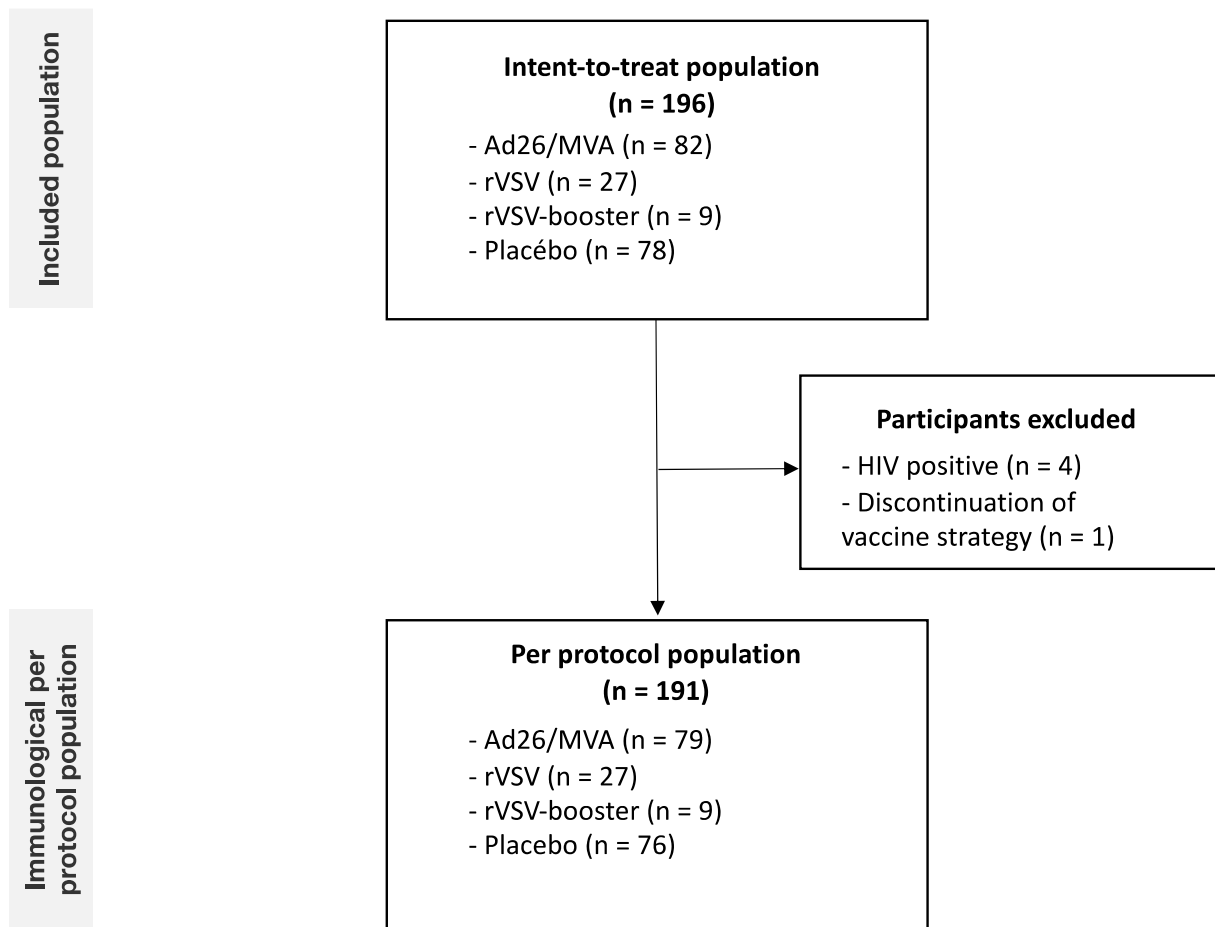

**Supplementary Figure 2. Sampling schedule and immunological assays performed by time point.**  
 Created with BioRender.com released under a Creative Commons Attribution-NonCommercial-NoDerivs 4.0 International license

|                                   | Time points                                                                          |    |     |     |                                                                                       |     |     |    |    |     |                                 |     |     |     |
|-----------------------------------|--------------------------------------------------------------------------------------|----|-----|-----|---------------------------------------------------------------------------------------|-----|-----|----|----|-----|---------------------------------|-----|-----|-----|
|                                   |  D0 | D7 | D14 | D28 |  D56 | D63 | D70 | M3 | M6 | M12 | M24                             | M36 | M48 | M60 |
| Antibody Response (n=93)          | X                                                                                    | X  | X   | X   | X                                                                                     | X   |     | X  | X  | X   |                                 |     |     |     |
| Ex-vivo T cell responses (n=191)  | X                                                                                    |    | X   |     |                                                                                       |     | X   |    |    | X   |                                 |     |     |     |
| Long-term T cell responses (n=31) |                                                                                      |    |     |     |                                                                                       |     |     |    |    |     | X                               | X   | X   | X   |
| Biomarkers in serum (n=92)        | X                                                                                    | X  |     |     |                                                                                       | X   |     |    |    |     |                                 |     |     |     |
| Biomarkers in supernatants (n=31) |                                                                                      |    |     |     |                                                                                       |     |     |    |    |     | X                               | X   | X   | X   |
|                                   | <b>PREVAC</b>                                                                        |    |     |     |                                                                                       |     |     |    |    |     | <b>PREVAC-UP</b><br>(follow-up) |     |     |     |

**Supplementary Figure 3. Magnitude of EBOV-specific CD4<sup>+</sup> and CD8<sup>+</sup> T-cell responses at months (M) 24, M36, M48, and M60 in the Ad26-MVA, rVSV, and rVSV-booster groups**

Total cytokine (IFN- $\gamma$   $\pm$  IL-2  $\pm$  MIP1B  $\pm$  TNF) levels (sum of the Boolean gates) produced by EBOV-specific CD4<sup>+</sup> (left) and CD8<sup>+</sup> (right) T cells from the Ad26-MVA, rVSV and rVSV-booster groups after in-vitro stimulation on D0 and re-stimulation on D8 with the EBOV peptide pools (1  $\mu$ g/mL) at M24 (n=11 Ad26-MVA, n=12 rVSV, n=6, rVSV-booster) (green), M36 (n=10 Ad26-MVA, n=11 rVSV, n=8 rVSV-booster) (orange), M48 (n=9 Ad26-MVA, n=11 rVSV, n=7 rVSV-booster) (violet), and M60 (n=9 Ad26-MVA, n=10 rVSV, n=7 rVSV-booster) (blue) after vaccination. Each dot represents an individual value of total cytokine. The box plots show the median (middle line) and the first and third quartiles (boxes), and the whiskers show 1.5 fold the interquartile range (IQR) above and below the box. Bivariate model was used for inter-arm comparisons. FDR (Benjamini-Hochberg) method was used to adjust for test multiplicity for each arm comparison separately

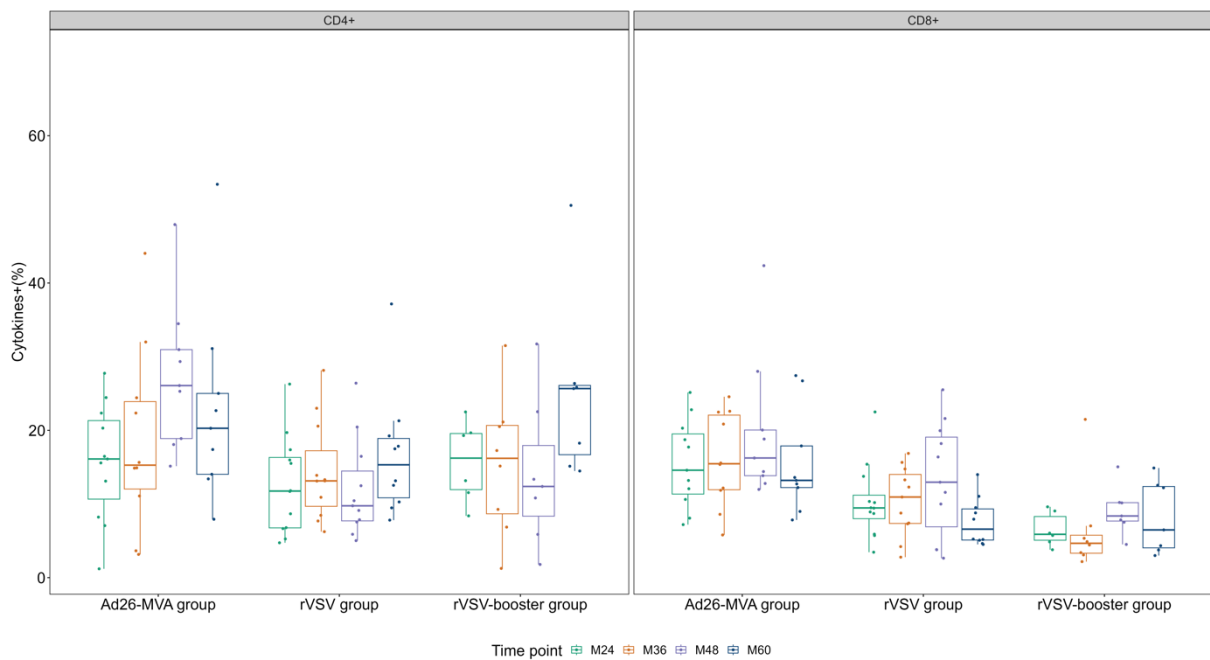

**Supplementary Figure 4. Gating strategy used for ex vivo intracellular staining (ICS) or Epimax analysis**

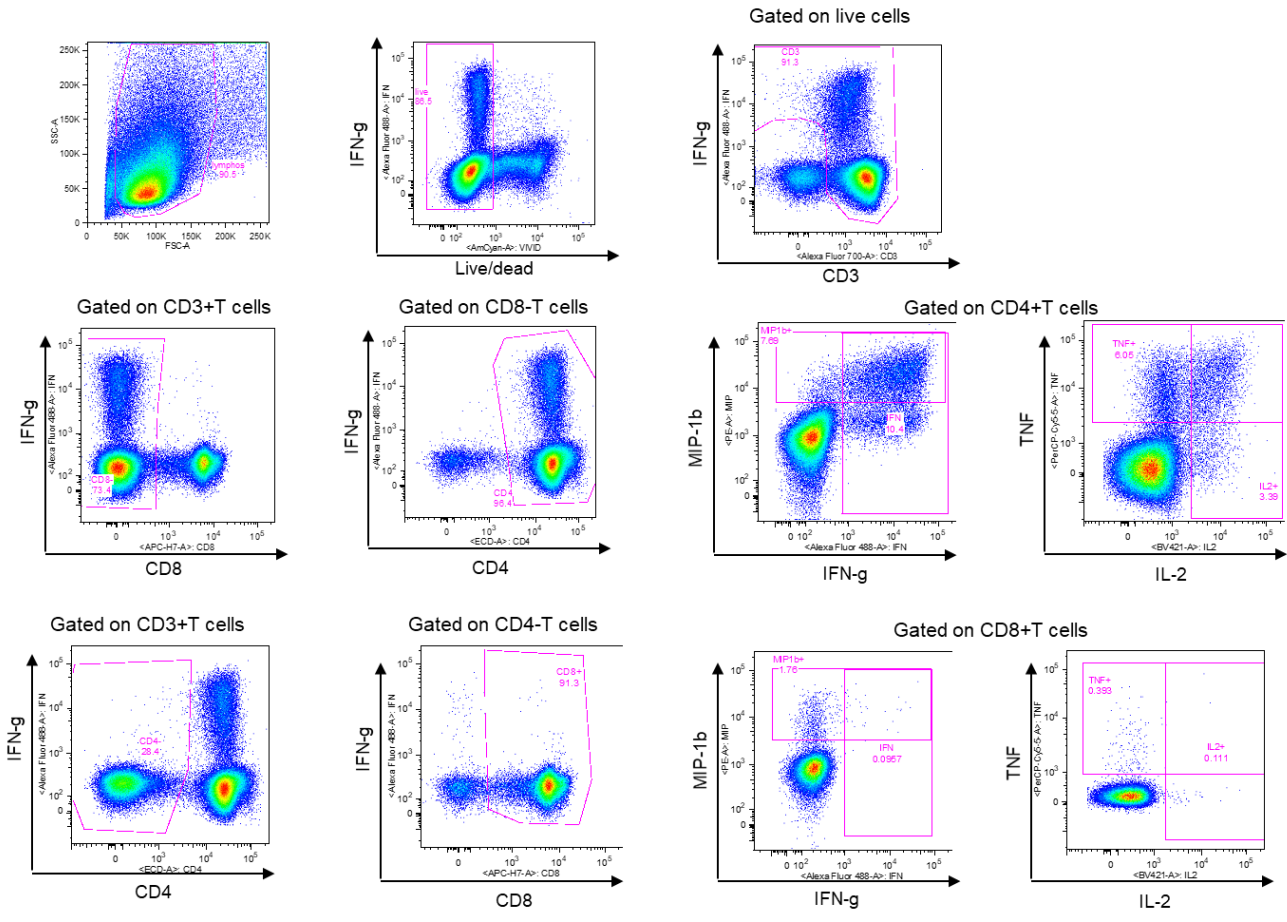

Supplement: 41467_2024_51453_MOESM1_ESM.pdf [file 41467_2024_51453_MOESM1_ESM.pdf]
